# Supplementary material for: Gene expression profiling analysis reveals a crucial gene regulating metabolism in adventitious roots of neem (Azadirachta indica)
Source: Royal Society of Chemistry journal article supplement (doi:10.1039/c6ra20494e), 2016-01-01
Supplement: c6ra20494e1.pdf [file c6ra20494e1.pdf]

Table S1 List of primers sequences of the selected genes for RT-qPCR

| Gene    | Gene ID      | Nucleotide sequences for primers             | Product size (bp) |
|---------|--------------|----------------------------------------------|-------------------|
| TGA     | c42668_g1_i1 | CAGCCAAAGCAATCAAGCGT<br>TCAACCTGCTTTTCCTCGCT | 138               |
| SAUR    | c12931_g1_i1 | CTCTCCGCACTTTCCCTCAC<br>ACTGCCTCAACATCTGTCGG | 111               |
| SAUR    | c58902_g1_i1 | TCCATGACCCGCTCGAAAA<br>ATGGAGCGGTTTCGTCGTAAG | 147               |
| PR1     | c42413_g1_i1 | GCGGCACCTTTGTTATCTGC<br>CAATCATCACCTCACGCACG | 114               |
| KAO     | c27636_g1_i1 | GGGTATCCCGTTGCCATGAA<br>TTCATGGCTGGTGGTTGGAG | 117               |
| KAO     | c15090_g1_i1 | CTCCTGGTGATATGGGCTGG<br>AAATCGCTCGTCGTCCATCA | 109               |
| GA3ox-2 | c10824_g1_i1 | GTCAGCGGCCTCCAGATTTT<br>TAATATGCGTCGGAGGGCTG | 202               |
| GA3ox-2 | c49690_g1_i1 | GGTCTTACCCGAGTGTGCTC<br>TGTGCCAAGATACTCGCTCC | 176               |
| SQLE    | c26224_g1_i1 | TGAGACGCAACCTCTGCAAT<br>ACCAAACAGCGAATCTCGGA | 166               |
| MVD     | c28767_g2_i1 | TCGTGCCTGTGATGTTGAGG<br>AGCAGCAGAGGAAGCCAATC | 130               |

Table S2 Number of differentially expression genes (DEGs) in GO pathways

| GO Slim    | Category           | Description                                                 | DEGs | p-value     |
|------------|--------------------|-------------------------------------------------------------|------|-------------|
| GO:0008150 | Biological Process | biological_process                                          | 76   | 0.07373607  |
| GO:0009653 | Biological Process | anatomical structure morphogenesis                          | 36   | 0.5275879   |
| GO:0016043 | Biological Process | cellular component organization                             | 109  | 0.6072271   |
| GO:0009987 | Biological Process | cellular process                                            | 541  | 0.8646903   |
| GO:0016265 | Biological Process | death                                                       | 13   | 0.1086476   |
| GO:0009790 | Biological Process | embryo development                                          | 3    | 0.9994034   |
| GO:0040007 | Biological Process | growth                                                      | 10   | 0.9955565   |
| GO:0008152 | Biological Process | metabolic process                                           | 772  | 5.37E-06    |
| GO:0007275 | Biological Process | multicellular organismal development                        | 64   | 0.9574919   |
| GO:0009791 | Biological Process | post-embryonic development                                  | 41   | 0.7425556   |
| GO:0040029 | Biological Process | regulation of gene expression, epigenetic                   | 6    | 0.9946273   |
| GO:0000003 | Biological Process | reproduction                                                | 27   | 0.9999384   |
| GO:0009628 | Biological Process | response to abiotic stimulus                                | 62   | 0.07916062  |
| GO:0009607 | Biological Process | response to biotic stimulus                                 | 36   | 0.006537785 |
| GO:0009719 | Biological Process | response to endogenous stimulus                             | 31   | 0.3881356   |
| GO:0009605 | Biological Process | response to external stimulus                               | 48   | 0.006930599 |
| GO:0006950 | Biological Process | response to stress                                          | 111  | 0.0132773   |
| GO:0003700 | Biological Process | sequence-specific DNA binding transcription factor activity | 13   | 0.7734611   |
| GO:0006810 | Biological Process | transport                                                   | 141  | 0.2919744   |
| GO:0005575 | Cellular Component | cellular_component                                          | 25   | 0.4133736   |
| GO:0005623 | Cellular Component | cell                                                        | 413  | 0.3359327   |
| GO:0005737 | Cellular Component | cytoplasm                                                   | 302  | 0.05007433  |
| GO:0005856 | Cellular Component | cytoskeleton                                                | 8    | 0.9851101   |
| GO:0005829 | Cellular Component | cytosol                                                     | 26   | 0.9986052   |
| GO:0005783 | Cellular Component | endoplasmic reticulum                                       | 13   | 0.9704135   |
| GO:0005768 | Cellular Component | endosome                                                    | 2    | 0.9991664   |
| GO:0030312 | Cellular Component | external encapsulating structure                            | 31   | 8.08E-06    |
| GO:0005576 | Cellular Component | extracellular region                                        | 82   | 7.98E-24    |
| GO:0005615 | Cellular Component | extracellular space                                         | 1    | 0.3264089   |
| GO:0005794 | Cellular Component | Golgi apparatus                                             | 10   | 0.9921006   |
| GO:0005622 | Cellular Component | intracellular                                               | 368  | 0.605164    |
| GO:0016020 | Cellular Component | membrane                                                    | 261  | 0.003589111 |
| GO:0005739 | Cellular Component | mitochondrion                                               | 20   | 0.9999995   |
| GO:0005654 | Cellular Component | nucleoplasm                                                 | 1    | 0.9974909   |

---

|            |                    |                              |     |           |
|------------|--------------------|------------------------------|-----|-----------|
| GO:0005634 | Cellular Component | nucleus                      | 40  | 1         |
| GO:0005777 | Cellular Component | peroxisome                   | 9   | 0.3181969 |
| GO:0009536 | Cellular Component | plastid                      | 205 | 5.29E-29  |
| GO:0005840 | Cellular Component | ribosome                     | 24  | 0.8736675 |
| GO:0009579 | Cellular Component | thylakoid                    | 113 | 3.81E-54  |
| GO:0005773 | Cellular Component | vacuole                      | 39  | 0.9992188 |
| GO:0003674 | Molecular Function | molecular_function           | 37  | 4.83E-12  |
| GO:0005488 | Molecular Function | binding                      | 458 | 0.4993076 |
| GO:0004872 | Molecular Function | receptor activity            | 6   | 0.360004  |
| GO:0005198 | Molecular Function | structural molecule activity | 24  | 0.8542385 |

---

Table S3 The number of differentially expression genes (DEGs) in KEGG pathways

| Category                             | Pathway                                     | DEG |
|--------------------------------------|---------------------------------------------|-----|
| Metabolism                           | Overview                                    | 22  |
| Metabolism                           | Carbohydrate metabolism                     | 54  |
| Metabolism                           | Energy metabolism                           | 62  |
| Metabolism                           | Lipid metabolism                            | 30  |
| Metabolism                           | Nucleotide metabolism                       | 4   |
| Metabolism                           | Amino acid metabolism                       | 42  |
| Metabolism                           | Metabolism of other amino acids             | 15  |
| Metabolism                           | Glycan biosynthesis and metabolism          | 1   |
| Metabolism                           | Metabolism of cofactors and vitamins        | 14  |
| Metabolism                           | Metabolism of terpenoids and polyketides    | 18  |
| Metabolism                           | Biosynthesis of other secondary metabolites | 29  |
| Metabolism                           | Xenobiotics biodegradation and metabolism   | 20  |
| Genetic Information Processing       | Transcription                               | 1   |
| Genetic Information Processing       | Translation                                 | 6   |
| Genetic Information Processing       | Folding, sorting and degradation            | 10  |
| Environmental Information Processing | Membrane transport                          | 5   |
| Environmental Information Processing | Signal transduction                         | 24  |
| Cellular Processes                   | Transport and catabolism                    | 4   |
| Cellular Processes                   | Cell growth and death                       | 12  |
| Cellular Processes                   | Cell communication                          | 1   |
| Organismal Systems                   | Immune system                               | 4   |
| Organismal Systems                   | Endocrine system                            | 14  |
| Organismal Systems                   | Circulatory system                          | 1   |
| Organismal Systems                   | Digestive system                            | 4   |
| Organismal Systems                   | Excretory system                            | 1   |
| Organismal Systems                   | Nervous system                              | 6   |
| Organismal Systems                   | Development                                 | 3   |
| Organismal Systems                   | Environmental adaptation                    | 12  |

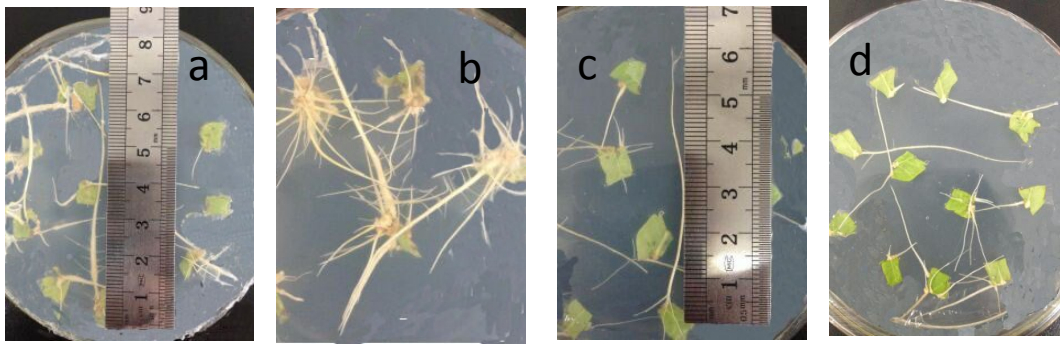

Figure S1. The figures of ARs were induced from young leaves of neem on MS medium supplement with different concentrations of IBA. The figure a and b were supplement with  $0.5 \text{ mg L}^{-1}$  IBA, and the figure c and d were supplement with  $1.5 \text{ mg L}^{-1}$  IBA.

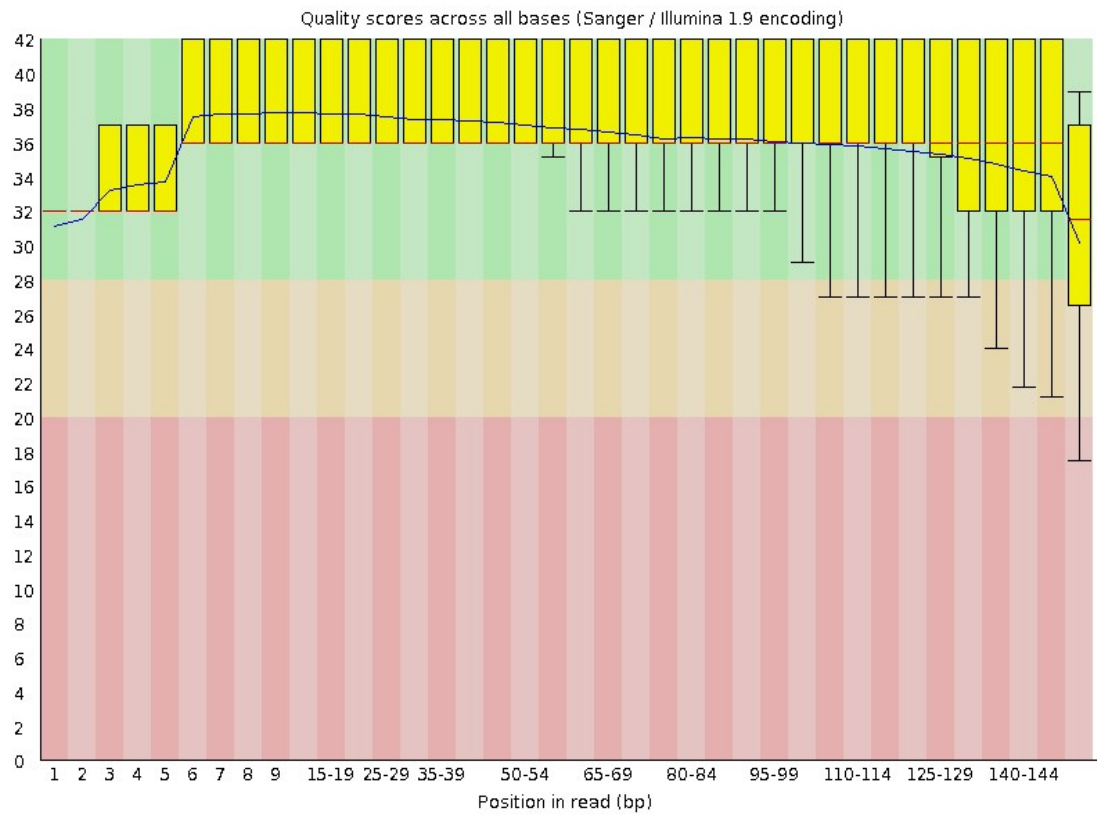

Figure S2. **Quality scores across all bases.** The X axis represents the position of bases in reads (5'-3'), while the Y axis represents the quality (Q) value of bases. Generally speaking, the quality of bases is better than the both ends.

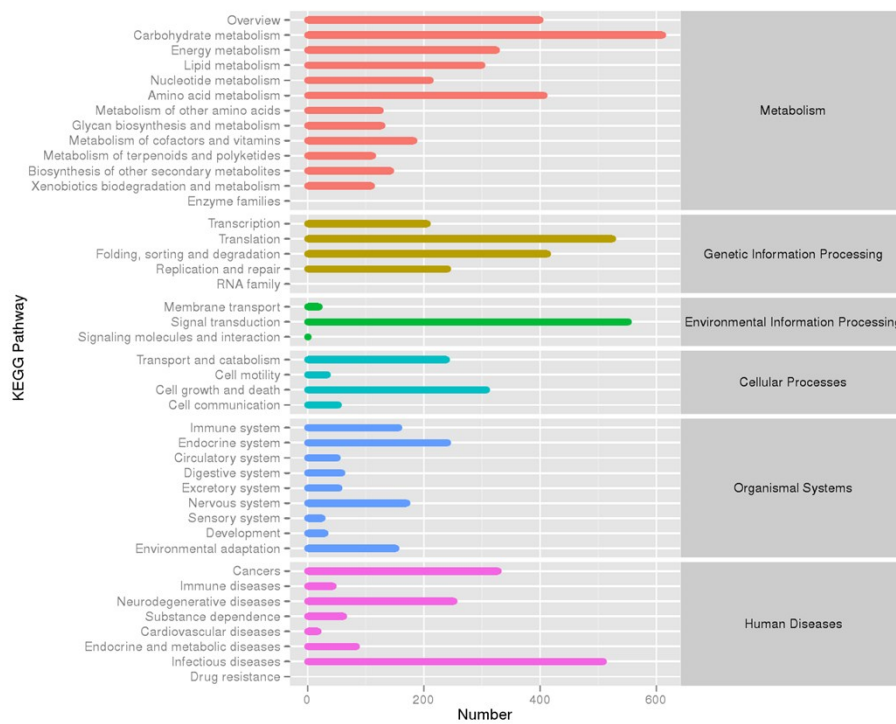

Figure S3. **KEGG pathway assignments.** Among NR unigene sequences, 5,380 transcripts were assigned to KEGG pathways by KASS analysis.
