# Supplementary material for: Gene expression profiling analysis reveals a crucial gene regulating metabolism in adventitious roots of neem (Azadirachta indica)
Source: Royal Society of Chemistry journal article supplement (doi:10.1039/c6ra20494e), 2016-01-01
Supplement: c6ra20494e2.xlsx [file c6ra20494e2.xlsx]

## Sheet: Sheet1
Supplementary table 2 Differentially expression genes (DGEs) in GO pathways
GO Slim	Category	Description	Up-regulated genes	Down-regulated genes	DEGs	p-value	up-regulated gene list	down-regulated gene list
GO:0008150	Biological Process	biological_process	27	49	76	0.0737361	c25442_g3_i1;c28827_g1_i1;c5054_g1_i1;c43100_g1_i1;c25406_g1_i2;c23517_g1_i3;c27151_g1_i2;c17476_g1_i1;c8138_g1_i1;c12776_g1_i1;c20805_g2_i1;c42269_g1_i1;c27431_g1_i1;c742_g1_i1;c30450_g1_i2;c30709_g1_i2;c23952_g1_i1;c30567_g1_i1;c56339_g1_i1;c44076_g1_i1;c13336_g1_i1;c19724_g1_i1;c2613_g1_i1;c7069_g1_i1;c32743_g1_i1;c16009_g1_i1;c19766_g1_i1	c24149_g1_i3;c26576_g1_i5;c16416_g1_i1;c13091_g1_i1;c25690_g1_i1;c28653_g1_i1;c9068_g1_i1;c17493_g1_i1;c42258_g1_i1;c20080_g1_i1;c17643_g1_i1;c24696_g1_i3;c15542_g1_i1;c18999_g1_i1;c28343_g1_i3;c49527_g1_i1;c25080_g1_i1;c49139_g1_i1;c31920_g5_i1;c5648_g1_i1;c8037_g1_i1;c30165_g1_i3;c35376_g1_i1;c13941_g1_i1;c18812_g1_i1;c25852_g1_i1;c21089_g1_i2;c16725_g1_i1;c6706_g1_i2;c1050_g1_i2;c46994_g1_i1;c…
GO:0009838	Biological Process	abscission	0	0	0	1	-	-
GO:0009653	Biological Process	anatomical structure morphogenesis	10	26	36	0.527588	c23517_g1_i3;c30567_g1_i1;c23952_g1_i1;c29670_g1_i1;c25442_g3_i1;c22712_g1_i2;c15903_g1_i1;c28943_g1_i1;c3492_g1_i1;c5546_g1_i2	c16416_g1_i1;c46994_g1_i1;c28555_g1_i2;c29760_g1_i3;c26576_g1_i5;c21087_g1_i1;c21842_g1_i2;c22455_g1_i1;c18283_g1_i1;c26679_g1_i2;c23691_g1_i4;c26160_g1_i1;c18999_g1_i1;c2989_g1_i1;c26240_g1_i2;c58037_g1_i1;c13873_g1_i1;c49515_g1_i1;c28696_g1_i2;c17764_g1_i1;c21173_g1_i1;c15413_g1_i3;c28018_g1_i2;c16746_g1_i1;c19671_g1_i3;c28857_g1_i1
GO:0007610	Biological Process	behavior	0	0	0	1	-	-
GO:0016043	Biological Process	cellular component organization	41	68	109	0.607227	c23517_g1_i3;c28385_g1_i1;c26147_g1_i1;c25442_g3_i1;c29846_g1_i2;c19845_g1_i2;c14286_g1_i1;c50341_g1_i1;c31779_g1_i1;c11785_g1_i1;c28141_g1_i3;c28173_g1_i2;c28218_g1_i1;c30228_g1_i2;c22047_g4_i1;c15209_g1_i1;c63447_g1_i1;c27392_g1_i2;c27748_g1_i1;c5546_g1_i2;c30063_g2_i1;c23630_g1_i2;c30327_g2_i3;c3563_g1_i1;c29698_g1_i2;c27431_g1_i1;c30894_g3_i1;c23611_g1_i1;c28943_g1_i1;c18990_g1_i1;c44076_g1_i…	c58037_g1_i1;c18999_g1_i1;c12709_g1_i2;c28343_g1_i3;c24221_g2_i1;c49548_g1_i1;c46970_g1_i1;c1286_g1_i2;c55981_g1_i1;c28555_g1_i2;c1903_g1_i1;c28653_g1_i1;c23809_g1_i1;c14443_g1_i2;c26240_g1_i2;c24301_g1_i2;c18159_g1_i5;c16746_g1_i1;c13873_g1_i1;c22904_g1_i1;c16725_g1_i1;c21842_g1_i2;c6825_g1_i1;c46994_g1_i1;c6706_g1_i2;c13112_g1_i1;c15424_g1_i1;c33945_g1_i1;c28722_g1_i2;c18161_g1_i1;c26679_g1_i2;…
GO:0009987	Biological Process	cellular process	182	359	541	0.86469	c21101_g2_i1;c28173_g1_i2;c23340_g1_i1;c19198_g1_i1;c25442_g2_i1;c14106_g1_i1;c2613_g1_i1;c21892_g1_i1;c26570_g1_i1;c5546_g1_i2;c36016_g1_i1;c13524_g1_i1;c1464_g1_i1;c5054_g1_i1;c30941_g2_i1;c25353_g1_i2;c15903_g1_i1;c25758_g1_i1;c23806_g1_i1;c12776_g1_i1;c22590_g1_i1;c13336_g1_i1;c30063_g1_i1;c5192_g1_i1;c22047_g1_i1;c23665_g1_i1;c13453_g1_i2;c29672_g1_i1;c43829_g1_i1;c63056_g1_i1;c64404_g1_i1;c…	c56031_g1_i1;c48505_g1_i1;c19544_g1_i3;c14140_g1_i2;c57904_g1_i1;c49540_g1_i1;c15196_g1_i1;c24593_g1_i3;c19791_g1_i1;c25232_g1_i1;c28695_g2_i1;c2989_g1_i1;c5692_g1_i1;c30306_g1_i1;c29407_g1_i1;c22329_g1_i1;c49002_g1_i1;c23547_g1_i1;c21575_g1_i1;c3963_g1_i1;c25852_g1_i1;c49175_g1_i1;c52123_g1_i1;c6725_g1_i1;c64920_g1_i1;c35376_g1_i1;c13941_g1_i1;c26897_g1_i2;c17966_g1_i1;c25080_g1_i1;c5026_g1_i1;c…
GO:0016265	Biological Process	death	0	13	13	0.108648	-	c46994_g1_i1;c25690_g1_i1;c31091_g1_i1;c13112_g1_i1;c26240_g1_i2;c2989_g1_i1;c18999_g1_i1;c43029_g1_i1;c58037_g1_i1;c24301_g1_i2;c22044_g1_i1;c13873_g1_i1;c17493_g1_i1
GO:0009790	Biological Process	embryo development	2	1	3	0.999403	c824_g1_i1;c30327_g2_i3	c28834_g1_i2
GO:0009835	Biological Process	fruit ripening	0	0	0	1	-	-
GO:0040007	Biological Process	growth	6	4	10	0.995556	c30567_g1_i1;c23952_g1_i1;c23517_g1_i3;c18990_g1_i1;c25442_g3_i1;c3492_g1_i1	c9360_g1_i1;c49548_g1_i1;c23691_g1_i4;c64557_g1_i1
GO:0008152	Biological Process	metabolic process	336	436	772	5.37236e-06	c21101_g2_i1;c28173_g1_i2;c23340_g1_i1;c20596_g1_i1;c18944_g1_i1;c5546_g1_i2;c42757_g1_i1;c22927_g1_i1;c23017_g1_i1;c30941_g2_i1;c50638_g1_i1;c23806_g1_i1;c12776_g1_i1;c22590_g1_i1;c22496_g1_i1;c3234_g1_i1;c23665_g1_i1;c13453_g1_i2;c20108_g1_i1;c43829_g1_i1;c16485_g1_i1;c20269_g1_i1;c64404_g1_i1;c26702_g1_i2;c63082_g1_i1;c18205_g1_i1;c673_g1_i1;c31682_g1_i1;c28184_g1_i1;c30228_g1_i2;c27842_g1_i1;…	c44177_g1_i1;c24501_g1_i1;c29605_g1_i2;c20080_g1_i1;c4743_g1_i1;c15542_g1_i1;c21858_g1_i1;c12363_g1_i1;c584_g1_i1;c25404_g1_i2;c24291_g1_i1;c5026_g1_i1;c17966_g1_i1;c25080_g1_i1;c26897_g1_i2;c35376_g1_i1;c13941_g1_i1;c64920_g1_i1;c6725_g1_i1;c25852_g1_i1;c52123_g1_i1;c49175_g1_i1;c26583_g1_i1;c3963_g1_i1;c21575_g1_i1;c22311_g1_i1;c49002_g1_i1;c23547_g1_i1;c13165_g1_i1;c22329_g1_i1;c30306_g1_i1;c2…
GO:0007275	Biological Process	multicellular organismal development	22	42	64	0.957492	c13800_g1_i1;c10091_g1_i1;c29670_g1_i1;c23952_g1_i1;c30567_g1_i1;c18990_g1_i1;c5546_g1_i2;c43558_g1_i1;c32743_g1_i1;c21655_g1_i1;c22712_g1_i2;c25442_g3_i1;c28600_g1_i2;c31395_g1_i1;c30327_g2_i3;c3492_g1_i1;c50341_g1_i1;c28943_g1_i1;c824_g1_i1;c42269_g1_i1;c49028_g1_i1;c15903_g1_i1	c2989_g1_i1;c20192_g1_i1;c26240_g1_i2;c27497_g1_i3;c30957_g1_i1;c17764_g1_i1;c64557_g1_i1;c28696_g1_i2;c13873_g1_i1;c15262_g1_i1;c16746_g1_i1;c28151_g1_i1;c19671_g1_i3;c28857_g1_i1;c9360_g1_i1;c15413_g1_i3;c27274_g1_i2;c46994_g1_i1;c18283_g1_i1;c21842_g1_i2;c26161_g1_i2;c29760_g1_i3;c30307_g1_i2;c27845_g3_i1;c26679_g1_i2;c2388_g1_i1;c18999_g1_i1;c58037_g1_i1;c49515_g1_i1;c30165_g1_i3;c28018_g1_i2…
GO:0009856	Biological Process	pollination	0	0	0	1	-	-
GO:0009791	Biological Process	post-embryonic development	15	26	41	0.742556	c21655_g1_i1;c824_g1_i1;c49028_g1_i1;c42269_g1_i1;c15903_g1_i1;c3492_g1_i1;c43558_g1_i1;c32743_g1_i1;c18990_g1_i1;c25442_g3_i1;c28600_g1_i2;c29670_g1_i1;c30327_g2_i3;c10091_g1_i1;c31395_g1_i1	c29605_g1_i2;c46994_g1_i1;c27274_g1_i2;c26576_g1_i5;c29760_g1_i3;c26161_g1_i2;c28555_g1_i2;c22455_g1_i1;c21842_g1_i2;c18283_g1_i1;c26679_g1_i2;c23691_g1_i4;c30307_g1_i2;c28834_g1_i2;c26160_g1_i1;c2388_g1_i1;c58037_g1_i1;c27497_g1_i3;c2989_g1_i1;c26240_g1_i2;c18999_g1_i1;c20192_g1_i1;c13873_g1_i1;c28857_g1_i1;c19671_g1_i3;c30165_g1_i3
GO:0040029	Biological Process	regulation of gene expression, epigenetic	3	3	6	0.994627	c29846_g1_i2;c28141_g1_i3;c19198_g1_i1	c26843_g1_i1;c62814_g1_i1;c26160_g1_i1
GO:0000003	Biological Process	reproduction	16	11	27	0.999938	c43558_g1_i1;c32743_g1_i1;c21655_g1_i1;c10091_g1_i1;c18990_g1_i1;c3492_g1_i1;c28943_g1_i1;c824_g1_i1;c42269_g1_i1;c49028_g1_i1;c15903_g1_i1;c25442_g3_i1;c30327_g2_i3;c28481_g1_i1;c43100_g1_i1;c23517_g1_i3	c23691_g1_i4;c30307_g1_i2;c28834_g1_i2;c26160_g1_i1;c30165_g1_i3;c27274_g1_i2;c29605_g1_i2;c2388_g1_i1;c27497_g1_i3;c21842_g1_i2;c20192_g1_i1
GO:0009628	Biological Process	response to abiotic stimulus	14	48	62	0.0791606	c7069_g1_i1;c8138_g1_i1;c28495_g1_i1;c25442_g3_i1;c5054_g1_i1;c31395_g1_i1;c15209_g1_i1;c28600_g1_i2;c36016_g1_i1;c26663_g1_i2;c30567_g1_i1;c23952_g1_i1;c15329_g2_i1;c43100_g1_i1	c28834_g1_i2;c17643_g1_i1;c25404_g1_i2;c20579_g1_i1;c15542_g1_i1;c1903_g1_i1;c28555_g1_i2;c26576_g1_i5;c16416_g1_i1;c25690_g1_i1;c36112_g1_i1;c23780_g2_i1;c29274_g1_i1;c35376_g1_i1;c35729_g1_i1;c21089_g1_i2;c28539_g2_i1;c18999_g1_i1;c58037_g1_i1;c25080_g1_i1;c2388_g1_i1;c26622_g1_i6;c39818_g1_i1;c30307_g1_i2;c33945_g1_i1;c20703_g1_i1;c18161_g1_i1;c21575_g1_i1;c26843_g1_i1;c6706_g1_i2;c46994_g1_i1…
GO:0009607	Biological Process	response to biotic stimulus	12	24	36	0.00653778	c15209_g1_i1;c29670_g1_i1;c23665_g1_i1;c22712_g1_i2;c43100_g1_i1;c56339_g1_i1;c32743_g1_i1;c27151_g1_i2;c27431_g1_i1;c42269_g1_i1;c19198_g1_i1;c16009_g1_i1	c46994_g1_i1;c6706_g1_i2;c13112_g1_i1;c25690_g1_i1;c55981_g1_i1;c18283_g1_i1;c1903_g1_i1;c25404_g1_i2;c33945_g1_i1;c27845_g3_i1;c21974_g1_i4;c17493_g1_i1;c39818_g1_i1;c58037_g1_i1;c2989_g1_i1;c18999_g1_i1;c26240_g1_i2;c62814_g1_i1;c28343_g1_i3;c24301_g1_i2;c13873_g1_i1;c22904_g1_i1;c25805_g1_i1;c29274_g1_i1
GO:0009719	Biological Process	response to endogenous stimulus	7	24	31	0.388136	c28495_g1_i1;c15209_g1_i1;c19845_g1_i2;c16618_g1_i1;c25442_g3_i1;c26663_g1_i2;c11018_g1_i1	c28151_g1_i1;c14943_g2_i1;c31499_g1_i4;c1286_g1_i2;c12308_g1_i1;c25399_g3_i1;c13873_g1_i1;c24301_g1_i2;c2989_g1_i1;c18999_g1_i1;c26240_g1_i2;c58037_g1_i1;c2388_g1_i1;c8723_g1_i1;c20080_g1_i1;c17643_g1_i1;c17493_g1_i1;c27845_g3_i1;c18283_g1_i1;c25690_g1_i1;c13112_g1_i1;c26618_g2_i1;c46994_g1_i1;c19828_g1_i1
GO:0009605	Biological Process	response to external stimulus	17	31	48	0.0069306	c5054_g1_i1;c25442_g3_i1;c43100_g1_i1;c36016_g1_i1;c27151_g1_i2;c42269_g1_i1;c27431_g1_i1;c30450_g1_i2;c23611_g1_i1;c23665_g1_i1;c15209_g1_i1;c29670_g1_i1;c56339_g1_i1;c32743_g1_i1;c7069_g1_i1;c16009_g1_i1;c19198_g1_i1	c13873_g1_i1;c22904_g1_i1;c30306_g2_i1;c23780_g2_i1;c29274_g1_i1;c49540_g1_i1;c58037_g1_i1;c2989_g1_i1;c18999_g1_i1;c26240_g1_i2;c62814_g1_i1;c24301_g1_i2;c30306_g1_i1;c28343_g1_i3;c25404_g1_i2;c27845_g3_i1;c33945_g1_i1;c30307_g1_i2;c18161_g1_i1;c21974_g1_i4;c17493_g1_i1;c39818_g1_i1;c46994_g1_i1;c6706_g1_i2;c26843_g1_i1;c13112_g1_i1;c25690_g1_i1;c55981_g1_i1;c18283_g1_i1;c26576_g1_i5;c1903_g1_i1
GO:0006950	Biological Process	response to stress	54	57	111	0.0132773	c52727_g1_i1;c50694_g1_i1;c19766_g1_i1;c16009_g1_i1;c32743_g1_i1;c30366_g1_i5;c16485_g1_i1;c7069_g1_i1;c22496_g1_i1;c18024_g1_i2;c56339_g1_i1;c30567_g1_i1;c50489_g1_i1;c23952_g1_i1;c23665_g1_i1;c28979_g3_i1;c27431_g1_i1;c30450_g1_i2;c742_g1_i1;c42269_g1_i1;c28495_g1_i1;c27451_g1_i1;c26945_g1_i1;c32493_g1_i1;c26663_g1_i2;c28600_g1_i2;c25851_g1_i1;c36673_g1_i1;c19529_g1_i1;c19198_g1_i1;c28711_g1_i2…	c20703_g1_i1;c22251_g2_i1;c27845_g3_i1;c33945_g1_i1;c30307_g1_i2;c39818_g1_i1;c21974_g1_i4;c13112_g1_i1;c46994_g1_i1;c27274_g1_i2;c6706_g1_i2;c43029_g1_i1;c18283_g1_i1;c60731_g1_i1;c13873_g1_i1;c30306_g2_i1;c22904_g1_i1;c17764_g1_i1;c64557_g1_i1;c57904_g1_i1;c49540_g1_i1;c61259_g1_i1;c9360_g1_i1;c24521_g1_i2;c28151_g1_i1;c68548_g1_i1;c35230_g1_i1;c30306_g1_i1;c24301_g1_i2;c27497_g1_i3;c2989_g1_i1…
GO:0003700	Biological Process	sequence-specific DNA binding transcription factor activity	6	7	13	0.773461	c18883_g1_i1;c65942_g1_i1;c25353_g1_i2;c21101_g2_i1;c824_g1_i1;c42668_g1_i1	c46387_g1_i1;c21173_g1_i1;c11399_g1_i1;c21842_g1_i2;c22942_g1_i1;c15262_g1_i1;c30307_g1_i2
GO:0045182	Biological Process	translation regulator activity	0	0	0	1	-	-
GO:0006810	Biological Process	transport	58	83	141	0.291974	c26803_g1_i1;c43100_g1_i1;c36016_g1_i1;c26528_g1_i1;c28827_g1_i1;c1464_g1_i1;c26147_g1_i1;c28533_g1_i1;c25442_g3_i1;c42962_g1_i1;c57759_g1_i1;c12776_g1_i1;c27151_g1_i2;c5052_g1_i1;c30589_g1_i1;c15209_g1_i1;c20685_g1_i1;c24777_g1_i2;c32076_g1_i1;c16679_g1_i1;c31496_g1_i2;c26176_g1_i2;c29311_g1_i4;c18944_g1_i1;c14106_g1_i1;c26766_g2_i2;c9611_g1_i1;c31682_g4_i1;c37560_g1_i1;c2613_g1_i1;c26625_g1_i1;…	c31499_g1_i4;c19544_g1_i3;c15196_g1_i1;c55972_g1_i1;c58959_g1_i1;c27362_g2_i1;c2989_g1_i1;c21119_g1_i1;c5692_g1_i1;c17430_g1_i1;c22009_g1_i4;c29857_g1_i2;c15260_g1_i1;c26843_g1_i1;c12659_g1_i1;c43029_g1_i1;c21089_g1_i2;c49515_g1_i1;c35376_g1_i1;c3405_g1_i1;c3338_g1_i1;c49139_g1_i1;c8723_g1_i1;c14021_g1_i1;c26897_g1_i2;c62814_g1_i1;c15542_g1_i1;c18931_g1_i2;c17493_g1_i1;c13690_g1_i3;c25690_g1_i1;c…
GO:0005575	Cellular Component	cellular_component	17	8	25	0.413374	c18990_g1_i1;c29670_g1_i1;c19774_g1_i1;c63144_g1_i1;c29672_g1_i1;c18944_g1_i1;c26996_g1_i1;c32743_g1_i1;c18837_g1_i2;c3199_g1_i1;c3563_g1_i1;c42269_g1_i1;c42962_g1_i1;c56472_g1_i1;c17753_g2_i1;c7163_g1_i1;c50341_g1_i1	c18812_g1_i1;c23197_g1_i1;c22904_g1_i1;c42258_g1_i1;c16725_g1_i1;c20192_g1_i1;c18283_g1_i1;c9728_g1_i1
GO:0005623	Cellular Component	cell	103	310	413	0.335933	c36016_g1_i1;c18837_g1_i2;c19845_g1_i2;c18883_g1_i1;c13524_g1_i1;c26147_g1_i1;c28533_g1_i1;c5054_g1_i1;c28827_g1_i1;c14286_g1_i1;c15903_g1_i1;c7163_g1_i1;c30701_g1_i1;c12776_g1_i1;c24144_g1_i2;c21101_g2_i1;c28218_g1_i1;c28173_g1_i2;c28141_g1_i3;c21125_g1_i2;c10667_g1_i1;c29670_g1_i1;c22047_g4_i1;c25442_g2_i1;c19198_g1_i1;c28697_g1_i4;c24897_g2_i1;c5546_g1_i2;c27748_g1_i1;c30932_g1_i1;c3563_g1_i1;…	c25690_g1_i1;c4174_g1_i1;c16416_g1_i1;c26576_g1_i5;c22061_g1_i1;c23691_g1_i4;c27943_g1_i8;c56418_g1_i1;c4798_g1_i1;c16729_g1_i1;c29905_g1_i4;c7382_g1_i1;c10033_g1_i2;c8723_g1_i1;c21089_g1_i2;c21173_g1_i1;c22222_g1_i1;c15260_g1_i1;c22942_g1_i1;c17430_g1_i1;c7269_g1_i1;c20229_g1_i1;c27362_g2_i1;c22969_g1_i3;c60731_g1_i1;c18425_g1_i1;c28696_g1_i2;c26220_g1_i3;c68076_g1_i1;c9360_g1_i1;c49004_g1_i1;c1…
GO:0005737	Cellular Component	cytoplasm	60	242	302	0.0500743	c38127_g1_i1;c13453_g1_i2;c50694_g1_i1;c16009_g1_i1;c1392_g1_i1;c29672_g1_i1;c43829_g1_i1;c13876_g1_i1;c32743_g1_i1;c26417_g1_i1;c30095_g1_i1;c14313_g1_i1;c30567_g1_i1;c23952_g1_i1;c18990_g1_i1;c13336_g1_i1;c44076_g1_i1;c31344_g1_i1;c11018_g1_i1;c23611_g1_i1;c25663_g1_i2;c28767_g2_i1;c26180_g1_i1;c27431_g1_i1;c30822_g1_i3;c49028_g1_i1;c42269_g1_i1;c1591_g1_i1;c37541_g1_i1;c17753_g2_i1;c23184_g1_i…	c31494_g2_i1;c23809_g1_i1;c58960_g1_i1;c19768_g1_i1;c28653_g1_i1;c55981_g1_i1;c28555_g1_i2;c28177_g1_i3;c14443_g1_i2;c31126_g2_i1;c27556_g1_i3;c9546_g1_i1;c55967_g1_i1;c24322_g4_i1;c41611_g1_i1;c26117_g1_i1;c19000_g1_i1;c60872_g1_i1;c24221_g2_i1;c31920_g5_i1;c49257_g1_i1;c18999_g1_i1;c4435_g1_i1;c58037_g1_i1;c23843_g1_i1;c35729_g1_i1;c35304_g1_i1;c8037_g1_i1;c36112_g1_i1;c23780_g2_i1;c5646_g1_i1;…
GO:0005856	Cellular Component	cytoskeleton	4	4	8	0.98511	c25442_g2_i1;c25442_g3_i1;c31779_g1_i1;c50341_g1_i1	c16645_g1_i1;c31851_g1_i1;c52474_g1_i1;c42267_g1_i1
GO:0005829	Cellular Component	cytosol	11	15	26	0.998605	c30228_g1_i2;c30567_g1_i1;c24144_g1_i2;c18837_g1_i2;c27151_g1_i2;c5546_g1_i2;c17753_g2_i1;c16009_g1_i1;c28767_g2_i1;c27431_g1_i1;c1392_g1_i1	c55967_g1_i1;c8037_g1_i1;c20080_g1_i1;c39818_g1_i1;c13941_g1_i1;c29905_g1_i4;c28696_g1_i2;c7303_g1_i1;c22904_g1_i1;c9546_g1_i1;c27209_g1_i1;c3963_g1_i1;c20903_g1_i1;c19828_g1_i1;c56657_g1_i1
GO:0005783	Cellular Component	endoplasmic reticulum	7	6	13	0.970414	c49028_g1_i1;c23611_g1_i1;c29670_g1_i1;c8138_g1_i1;c43558_g1_i1;c7163_g1_i1;c1591_g1_i1	c31404_g1_i6;c29613_g1_i1;c15196_g1_i1;c16746_g1_i1;c23691_g1_i4;c18812_g1_i1
GO:0005768	Cellular Component	endosome	2	0	2	0.999166	c21125_g1_i2;c14313_g1_i1	-
GO:0030312	Cellular Component	external encapsulating structure	26	5	31	8.08478e-06	c30063_g1_i1;c28218_g1_i1;c28173_g1_i2;c18990_g1_i1;c10091_g1_i1;c22047_g4_i1;c22047_g1_i1;c14531_g1_i1;c27392_g1_i2;c1392_g1_i1;c63447_g1_i1;c21655_g1_i1;c27748_g1_i1;c21809_g1_i1;c49485_g1_i1;c43829_g1_i1;c30063_g2_i1;c23630_g1_i2;c15329_g2_i1;c28385_g1_i1;c3563_g1_i1;c27431_g1_i1;c30894_g3_i1;c28495_g1_i1;c11785_g1_i1;c7163_g1_i1	c19709_g1_i1;c18283_g1_i1;c24291_g1_i1;c27041_g1_i1;c24221_g2_i1
GO:0005576	Cellular Component	extracellular region	62	20	82	7.98334e-24	c30894_g3_i1;c4400_g1_i1;c26596_g1_i1;c27431_g1_i1;c42269_g1_i1;c27451_g1_i1;c28495_g1_i1;c32493_g1_i1;c30063_g2_i1;c49673_g1_i1;c25851_g1_i1;c5727_g1_i1;c52727_g1_i1;c21655_g1_i1;c1392_g1_i1;c43829_g1_i1;c49485_g1_i1;c32743_g1_i1;c7476_g1_i1;c22496_g1_i1;c18024_g1_i2;c56339_g1_i1;c3234_g1_i1;c5192_g1_i1;c30063_g1_i1;c14531_g1_i1;c10091_g1_i1;c31686_g1_i1;c27386_g1_i2;c42962_g1_i1;c35866_g1_i1;c2…	c35230_g1_i1;c24221_g2_i1;c18999_g1_i1;c2989_g1_i1;c58037_g1_i1;c22904_g1_i1;c13873_g1_i1;c19709_g1_i1;c49540_g1_i1;c16416_g1_i1;c6706_g1_i2;c46994_g1_i1;c25690_g1_i1;c13112_g1_i1;c22455_g1_i1;c19403_g1_i1;c18283_g1_i1;c24503_g1_i1;c1903_g1_i1;c33945_g1_i1
GO:0005615	Cellular Component	extracellular space	1	0	1	0.326409	c10091_g1_i1	-
GO:0005794	Cellular Component	Golgi apparatus	8	2	10	0.992101	c12776_g1_i1;c17753_g2_i1;c13524_g1_i1;c29698_g1_i2;c15209_g1_i1;c14313_g1_i1;c18990_g1_i1;c28141_g1_i3	c29613_g1_i1;c26576_g1_i5
GO:0005622	Cellular Component	intracellular	75	293	368	0.605164	c17753_g2_i1;c28767_g2_i1;c25663_g1_i2;c11018_g1_i1;c42269_g1_i1;c30450_g1_i2;c30822_g1_i3;c28600_g1_i2;c30932_g1_i1;c13876_g1_i1;c43829_g1_i1;c30095_g1_i1;c26417_g1_i1;c13453_g1_i2;c38127_g1_i1;c50694_g1_i1;c29672_g1_i1;c23665_g1_i1;c30567_g1_i1;c13336_g1_i1;c18990_g1_i1;c7163_g1_i1;c12776_g1_i1;c15903_g1_i1;c13524_g1_i1;c18883_g1_i1;c19845_g1_i2;c28533_g1_i1;c26147_g1_i1;c5054_g1_i1;c18837_g1_i…	c23843_g1_i1;c5646_g1_i1;c8037_g1_i1;c24221_g2_i1;c31920_g5_i1;c16778_g1_i1;c19000_g1_i1;c60872_g1_i1;c23197_g1_i1;c9546_g1_i1;c31126_g2_i1;c41611_g1_i1;c55967_g1_i1;c24322_g4_i1;c14467_g1_i1;c28653_g1_i1;c17720_g1_i1;c19768_g1_i1;c31494_g2_i1;c28555_g1_i2;c11399_g1_i1;c30306_g2_i1;c29616_g1_i2;c28857_g1_i1;c28151_g1_i1;c26240_g1_i2;c21079_g1_i1;c63217_g1_i1;c28722_g1_i2;c39818_g1_i1;c8928_g1_i1;…
GO:0016020	Cellular Component	membrane	89	172	261	0.00358911	c28141_g1_i3;c28218_g1_i1;c29670_g1_i1;c21125_g1_i2;c31496_g1_i2;c32076_g1_i1;c24777_g1_i2;c14106_g1_i1;c49199_g1_i1;c2613_g1_i1;c37560_g1_i1;c24897_g2_i1;c26803_g1_i1;c18837_g1_i2;c36016_g1_i1;c22360_g1_i1;c28827_g1_i1;c1464_g1_i1;c28533_g1_i1;c13524_g1_i1;c19845_g1_i2;c14286_g1_i1;c12776_g1_i1;c57759_g1_i1;c25758_g1_i1;c7163_g1_i1;c3234_g1_i1;c13336_g1_i1;c18990_g1_i1;c19972_g1_i2;c63144_g1_i1;…	c7429_g1_i1;c8723_g1_i1;c21089_g1_i2;c63633_g1_i1;c28018_g1_i2;c15422_g1_i1;c25690_g1_i1;c55931_g1_i1;c26576_g1_i5;c23691_g1_i4;c56418_g1_i1;c22061_g1_i1;c18931_g1_i2;c29626_g2_i4;c20579_g1_i1;c17493_g1_i1;c42258_g1_i1;c4798_g1_i1;c55972_g1_i1;c24174_g1_i1;c20229_g1_i1;c31499_g1_i4;c6420_g1_i1;c8412_g1_i1;c19671_g1_i3;c19709_g1_i1;c68076_g1_i1;c9360_g1_i1;c49004_g1_i1;c15260_g1_i1;c43029_g1_i1;c1…
GO:0005739	Cellular Component	mitochondrion	5	15	20	1	c15329_g2_i1;c27978_g2_i1;c18837_g1_i2;c5054_g1_i1;c7163_g1_i1	c7442_g1_i2;c38005_g1_i1;c47205_g1_i1;c31126_g2_i1;c16670_g1_i1;c28151_g1_i1;c15771_g1_i1;c39818_g1_i1;c19958_g1_i1;c39367_g1_i1;c23242_g1_i1;c31137_g2_i1;c64039_g1_i1;c29082_g1_i1;c21923_g1_i1
GO:0005635	Cellular Component	nuclear envelope	0	0	0	1	-	-
GO:0005730	Cellular Component	nucleolus	0	0	0	1	-	-
GO:0005654	Cellular Component	nucleoplasm	1	0	1	0.997491	c23517_g1_i3	-
GO:0005634	Cellular Component	nucleus	14	26	40	1	c65942_g1_i1;c13876_g1_i1;c15903_g1_i1;c30822_g1_i3;c824_g1_i1;c26147_g1_i1;c23665_g1_i1;c28600_g1_i2;c18883_g1_i1;c13800_g1_i1;c44076_g1_i1;c23517_g1_i3;c25040_g1_i1;c21101_g2_i1	c4174_g1_i1;c21842_g1_i2;c22942_g1_i1;c18283_g1_i1;c11399_g1_i1;c29626_g2_i4;c9546_g1_i1;c29551_g1_i2;c7269_g1_i1;c30307_g1_i2;c17372_g1_i2;c29905_g1_i4;c20080_g1_i1;c49548_g1_i1;c16778_g1_i1;c2388_g1_i1;c3646_g1_i1;c20903_g1_i1;c15262_g1_i1;c60731_g1_i1;c12308_g1_i1;c10728_g1_i2;c21173_g1_i1;c57429_g1_i1;c36112_g1_i1;c19195_g1_i1
GO:0005777	Cellular Component	peroxisome	3	6	9	0.318197	c30327_g2_i3;c37541_g1_i1;c31344_g1_i1	c44177_g1_i1;c2989_g1_i1;c58037_g1_i1;c55953_g1_i1;c22904_g1_i1;c26220_g1_i3
GO:0009536	Cellular Component	plastid	15	190	205	5.28762e-29	c15329_g2_i1;c13336_g1_i1;c44076_g1_i1;c27978_g2_i1;c43100_g1_i1;c30932_g1_i1;c30228_g1_i2;c10667_g1_i1;c28697_g1_i4;c42269_g1_i1;c29672_g1_i1;c13453_g1_i2;c26417_g1_i1;c32743_g1_i1;c5546_g1_i2	c25789_g1_i4;c9436_g1_i1;c8928_g1_i1;c13112_g1_i1;c6825_g1_i1;c46994_g1_i1;c6706_g1_i2;c19759_g1_i1;c39818_g1_i1;c56149_g1_i1;c26679_g1_i2;c63217_g1_i1;c28722_g1_i2;c21923_g1_i1;c26240_g1_i2;c21079_g1_i1;c31137_g2_i1;c46044_g1_i1;c29616_g1_i2;c28857_g1_i1;c28151_g1_i1;c42636_g1_i1;c22904_g1_i1;c30306_g2_i1;c28177_g1_i3;c28555_g1_i2;c55981_g1_i1;c28653_g1_i1;c19768_g1_i1;c23809_g1_i1;c58960_g1_i1;…
GO:0005578	Cellular Component	proteinaceous extracellular matrix	0	0	0	1	-	-
GO:0005840	Cellular Component	ribosome	1	23	24	0.873668	c43829_g1_i1	c5026_g1_i1;c56657_g1_i1;c17966_g1_i1;c5736_g1_i1;c63633_g1_i1;c13941_g1_i1;c8037_g1_i1;c56031_g1_i1;c12572_g1_i1;c7303_g1_i1;c47205_g1_i1;c42450_g1_i1;c3963_g1_i1;c16725_g1_i1;c27209_g1_i1;c24054_g1_i1;c8928_g1_i1;c16416_g1_i1;c16729_g1_i1;c15597_g1_i1;c30443_g3_i1;c2002_g1_i1;c18406_g1_i1
GO:0009579	Cellular Component	thylakoid	0	113	113	3.81362e-54	-	c25686_g1_i2;c10450_g1_i1;c39818_g1_i1;c42349_g1_i1;c33945_g1_i1;c63217_g1_i1;c26679_g1_i2;c52907_g1_i1;c25789_g1_i4;c22967_g1_i1;c13895_g1_i4;c13103_g1_i1;c46994_g1_i1;c6825_g1_i1;c6706_g1_i2;c67125_g1_i1;c13112_g1_i1;c12220_g1_i1;c28857_g1_i1;c28151_g1_i1;c42636_g1_i1;c62951_g1_i1;c29616_g1_i2;c19697_g1_i1;c56945_g1_i1;c13873_g1_i1;c35532_g1_i1;c35707_g1_i1;c26240_g1_i2;c21079_g1_i1;c18159_g1_i…
GO:0005773	Cellular Component	vacuole	25	14	39	0.999219	c28141_g1_i3;c13336_g1_i1;c18990_g1_i1;c23952_g1_i1;c14313_g1_i1;c29670_g1_i1;c15209_g1_i1;c21125_g1_i2;c1392_g1_i1;c43558_g1_i1;c43100_g1_i1;c28533_g1_i1;c13524_g1_i1;c29698_g1_i2;c42962_g1_i1;c49028_g1_i1;c27431_g1_i1;c26180_g1_i1;c23611_g1_i1;c11018_g1_i1;c8138_g1_i1;c17753_g2_i1;c12776_g1_i1;c1591_g1_i1;c7163_g1_i1	c28151_g1_i1;c16746_g1_i1;c21974_g1_i4;c29613_g1_i1;c15196_g1_i1;c23691_g1_i4;c18812_g1_i1;c18161_g1_i1;c2989_g1_i1;c58037_g1_i1;c31404_g1_i6;c26576_g1_i5;c31494_g2_i1;c29605_g1_i2
GO:0003674	Molecular Function	molecular_function	12	25	37	4.83112e-12	c14233_g1_i1;c31686_g1_i1;c48987_g1_i1;c32749_g1_i1;c31264_g1_i1;c42732_g1_i1;c49413_g1_i1;c43558_g1_i1;c27451_g1_i1;c23806_g1_i1;c49028_g1_i1;c20562_g1_i1	c27497_g1_i3;c20337_g1_i1;c6594_g1_i1;c28487_g1_i1;c24593_g1_i3;c23242_g1_i1;c35230_g1_i1;c9799_g1_i1;c19195_g1_i1;c15771_g1_i1;c19697_g1_i1;c3480_g1_i1;c18283_g1_i1;c27274_g1_i2;c7310_g1_i1;c13112_g1_i1;c20017_g1_i1;c25690_g1_i1;c17656_g1_i1;c4743_g1_i1;c4798_g1_i1;c23691_g1_i4;c15542_g1_i1;c43895_g1_i1;c22251_g2_i1
GO:0005488	Molecular Function	binding	222	236	458	0.499308	c18944_g1_i1;c36673_g1_i1;c19198_g1_i1;c25442_g2_i1;c20596_g1_i1;c28662_g2_i1;c5546_g1_i2;c29908_g1_i1;c28173_g1_i2;c51129_g1_i1;c25974_g1_i5;c21101_g2_i1;c56202_g1_i1;c20412_g1_i1;c23340_g1_i1;c15903_g1_i1;c58637_g1_i1;c25353_g1_i2;c22590_g1_i1;c23806_g1_i1;c42757_g1_i1;c1464_g1_i1;c5054_g1_i1;c30941_g2_i1;c29672_g1_i1;c20108_g1_i1;c63082_g1_i1;c30282_g2_i1;c18205_g1_i1;c63056_g1_i1;c22143_g1_i1…	c32161_g1_i1;c63633_g1_i1;c21173_g1_i1;c21089_g1_i2;c62814_g1_i1;c25159_g1_i1;c2388_g1_i1;c8723_g1_i1;c13690_g1_i3;c42258_g1_i1;c4798_g1_i1;c13958_g1_i3;c29905_g1_i4;c23691_g1_i4;c27943_g1_i8;c31849_g1_i1;c18699_g1_i1;c29626_g2_i4;c24054_g1_i1;c2643_g1_i1;c9728_g1_i1;c26576_g1_i5;c22633_g1_i1;c62912_g1_i1;c16416_g1_i1;c8025_g1_i1;c25690_g1_i1;c4174_g1_i1;c19195_g1_i1;c27405_g1_i3;c57429_g1_i1;c18…
GO:0004872	Molecular Function	receptor activity	1	5	6	0.360004	c18180_g1_i1	c26576_g1_i5;c58959_g1_i1;c26843_g1_i1;c18161_g1_i1;c31499_g1_i4
GO:0005198	Molecular Function	structural molecule activity	3	21	24	0.854239	c25442_g3_i1;c43829_g1_i1;c25442_g2_i1	c30443_g3_i1;c16729_g1_i1;c15597_g1_i1;c2002_g1_i1;c18406_g1_i1;c16725_g1_i1;c24054_g1_i1;c3963_g1_i1;c28896_g2_i1;c8037_g1_i1;c63633_g1_i1;c7303_g1_i1;c12572_g1_i1;c47205_g1_i1;c49175_g1_i1;c56031_g1_i1;c5026_g1_i1;c18159_g1_i5;c17966_g1_i1;c5736_g1_i1;c56657_g1_i1
GO:0030528	Molecular Function	transcription regulator activity	0	0	0	1	-	-
